# Supplementary material for: Improved exchange reaction in an ionic liquid electrolyte of a quasi-solid-state dye-sensitized solar cell by using 15-crown-5-functionalized MWCNT
Source: Royal Society of Chemistry journal article supplement (doi:10.1039/c1jm12179k), 2011-01-01
Supplement: c1jm12179k.pdf [file c1jm12179k.pdf]

## Supplementary Information

### Improved exchange reaction in an ionic liquid electrolyte of a quasi-solid-state dye-sensitized solar cell by using 15-crown-5-functionalized MWCNT

Kuan-Chieh Huang,<sup>a</sup> Yu-Hsun Chang,<sup>b</sup> Chia-Yuan Chen,<sup>c</sup> Chen-Yu Liu,<sup>a</sup> Lu-Yin Lin,<sup>a</sup> R. Vittal,<sup>a</sup> Chun-Guey Wu,<sup>c</sup> King-Fu Lin<sup>\*b,d</sup> and Kuo-Chuan Ho<sup>\*a,b</sup>

<sup>a</sup> Department of Chemical Engineering, National Taiwan University, Taipei 10617, Taiwan

<sup>b</sup> Institute of Polymer Science and Engineering, National Taiwan University, Taipei 10617, Taiwan

<sup>c</sup> Department of Chemistry, National Central University, Chung-Li 32001, Taiwan

<sup>d</sup> Department of Materials Science and Engineering, National Taiwan University, Taipei 10617, Taiwan

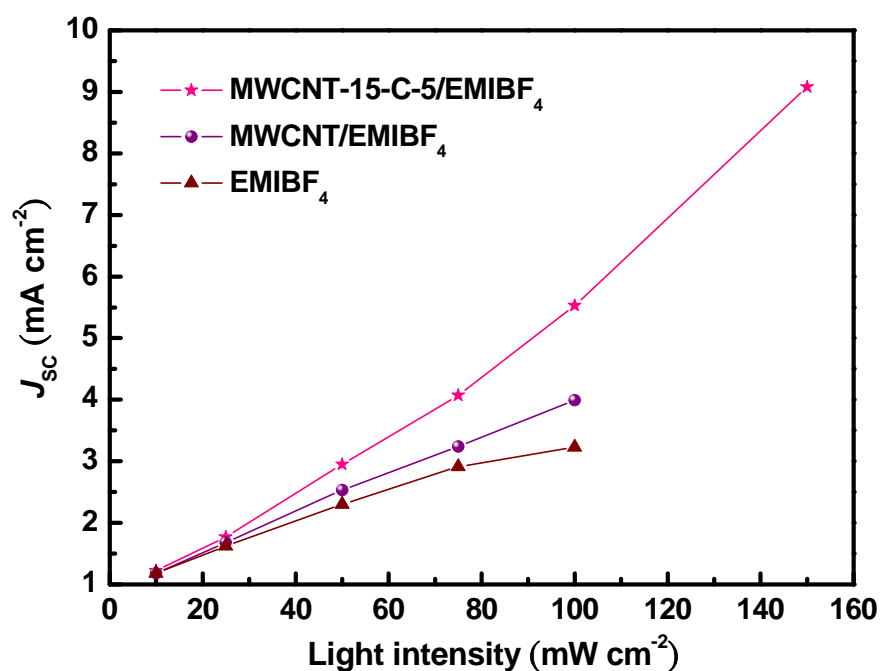

**Fig. S1** Short-circuit current density ( $J_{SC}$ ) as a function of light intensity for the DSSCs with the electrolytes of EMIBF<sub>4</sub>, MWCNT/EMIBF<sub>4</sub>, and MWCNT-15-C-5/EMIBF<sub>4</sub>.

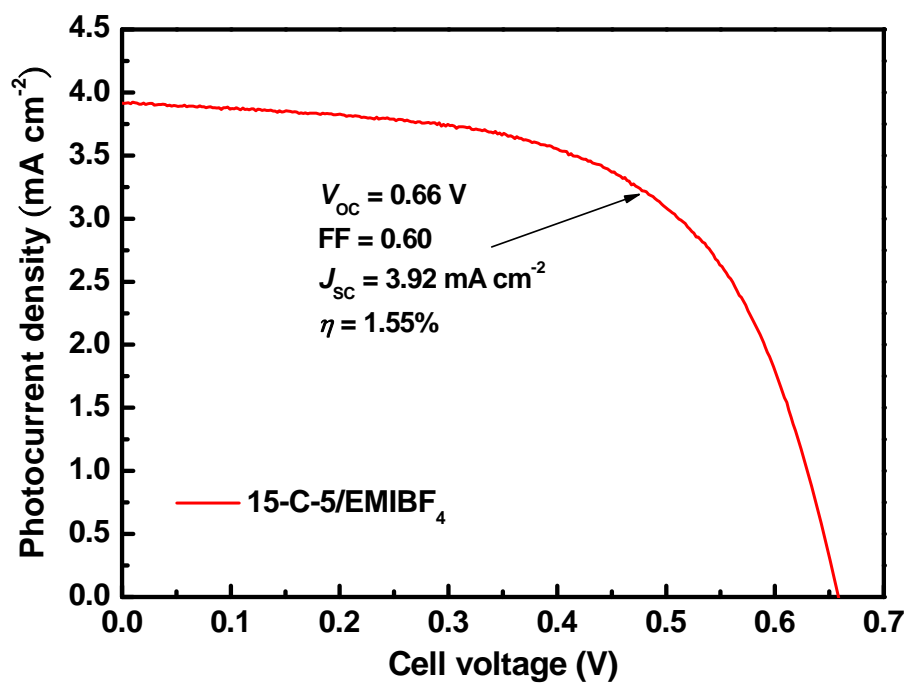

**Fig. S2** Photocurrent density-voltage ( $J$ - $V$ ) characteristic of the DSSC with the EMIBF<sub>4</sub>-based electrolyte consisting of 0.5 M 15-crown-5 (15-C-5), 0.5 M LiI, 0.05 M I<sub>2</sub>, and 0.5 M TBP, at 100 mW cm<sup>-2</sup> illumination, and its corresponding photovoltaic parameters.

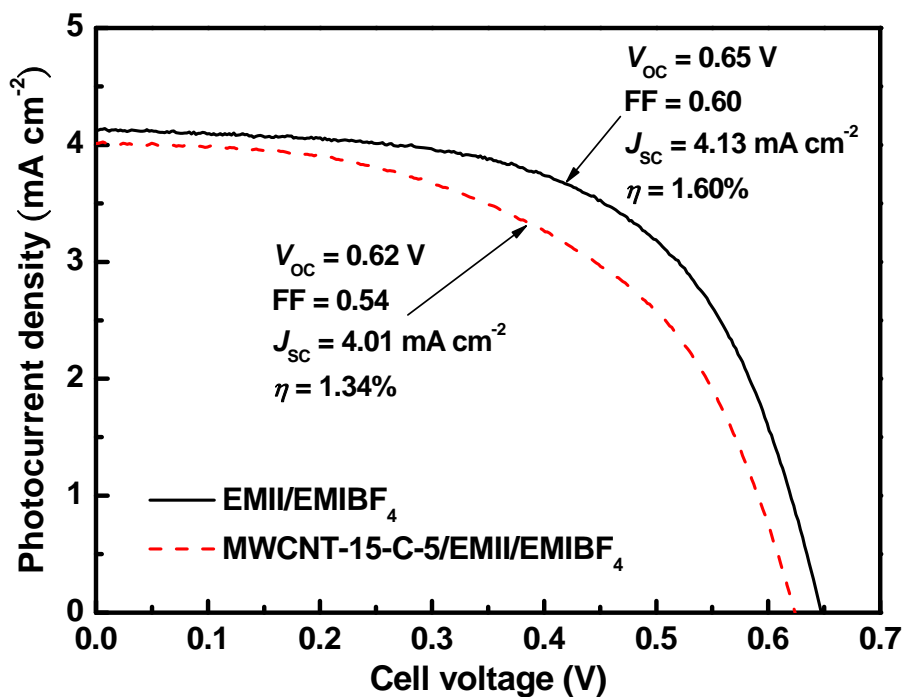

**Fig. S3** Photocurrent density-voltage ( $J$ - $V$ ) characteristics of the DSSCs with and without using the MWCNT-15-C-5, at  $100 \text{ mW cm}^{-2}$  illumination, and their corresponding photovoltaic parameters.
